# Supplementary material
Source: PubMed Central journal article supplement (PMC7213806)
Supplement: jciinsight-5-132334-s151.pdf [file jciinsight-5-132334-s151.pdf]

# Suppl. Figure 1

## A

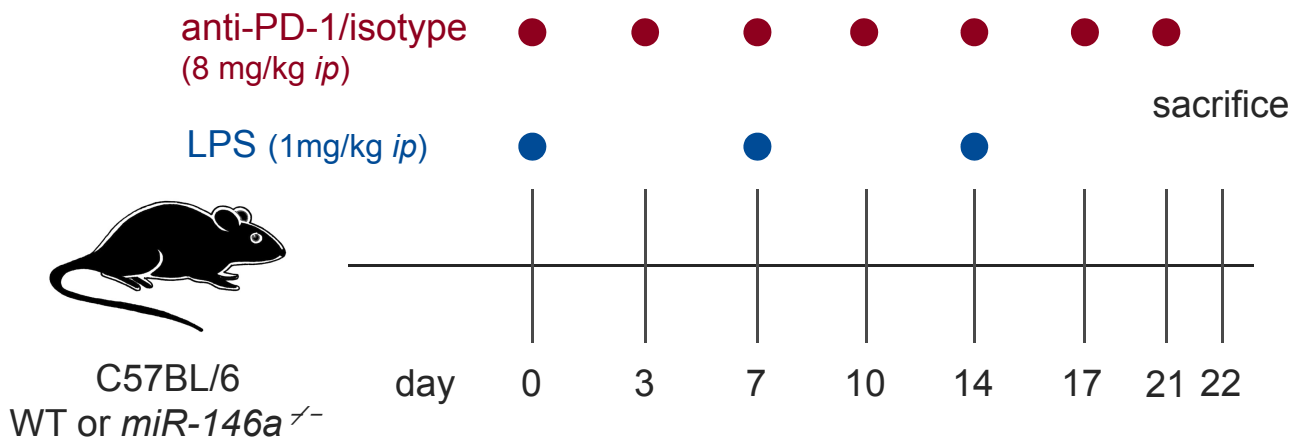

## B

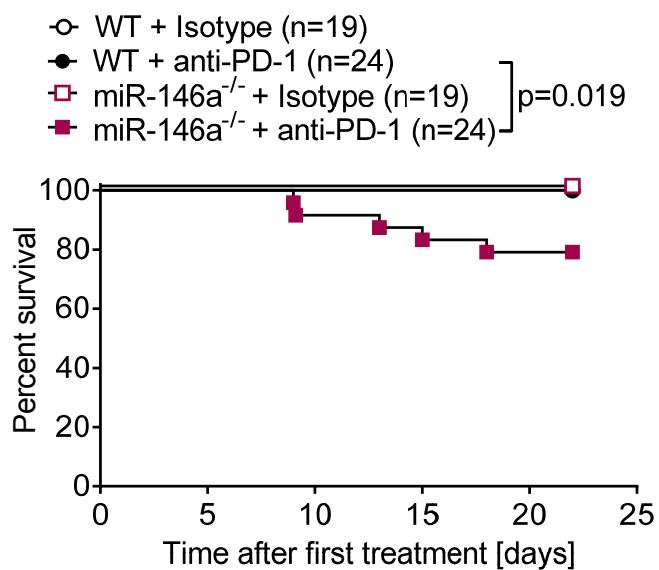

**Suppl. Figure 1: Decreased survival of *miR-146a*<sup>-/-</sup> mice in a mouse model for immune-related adverse events (irAEs).** A. In order to induce irAEs, C57BL/6 mice were injected intraperitoneally (*ip*) with 8 mg/kg anti-PD-1 antibody (clone J43) on days 0, 3, 7, 10, 14, 17 and 21 and with 1 mg/kg LPS *ip* on days 0, 7 and 14. Control mice received Armenian hamster isotype control antibody and LPS according to the same dose and schedule. Mice were sacrificed on day 22 and organs were isolated for downstream analysis. B. Kaplan-Meier curves depicting survival of irAE mice until the day of sacrifice. Data were pooled from four independent experiments. Statistics were calculated by log-rank (Mantel-Cox) test.

## Suppl. Figure 2

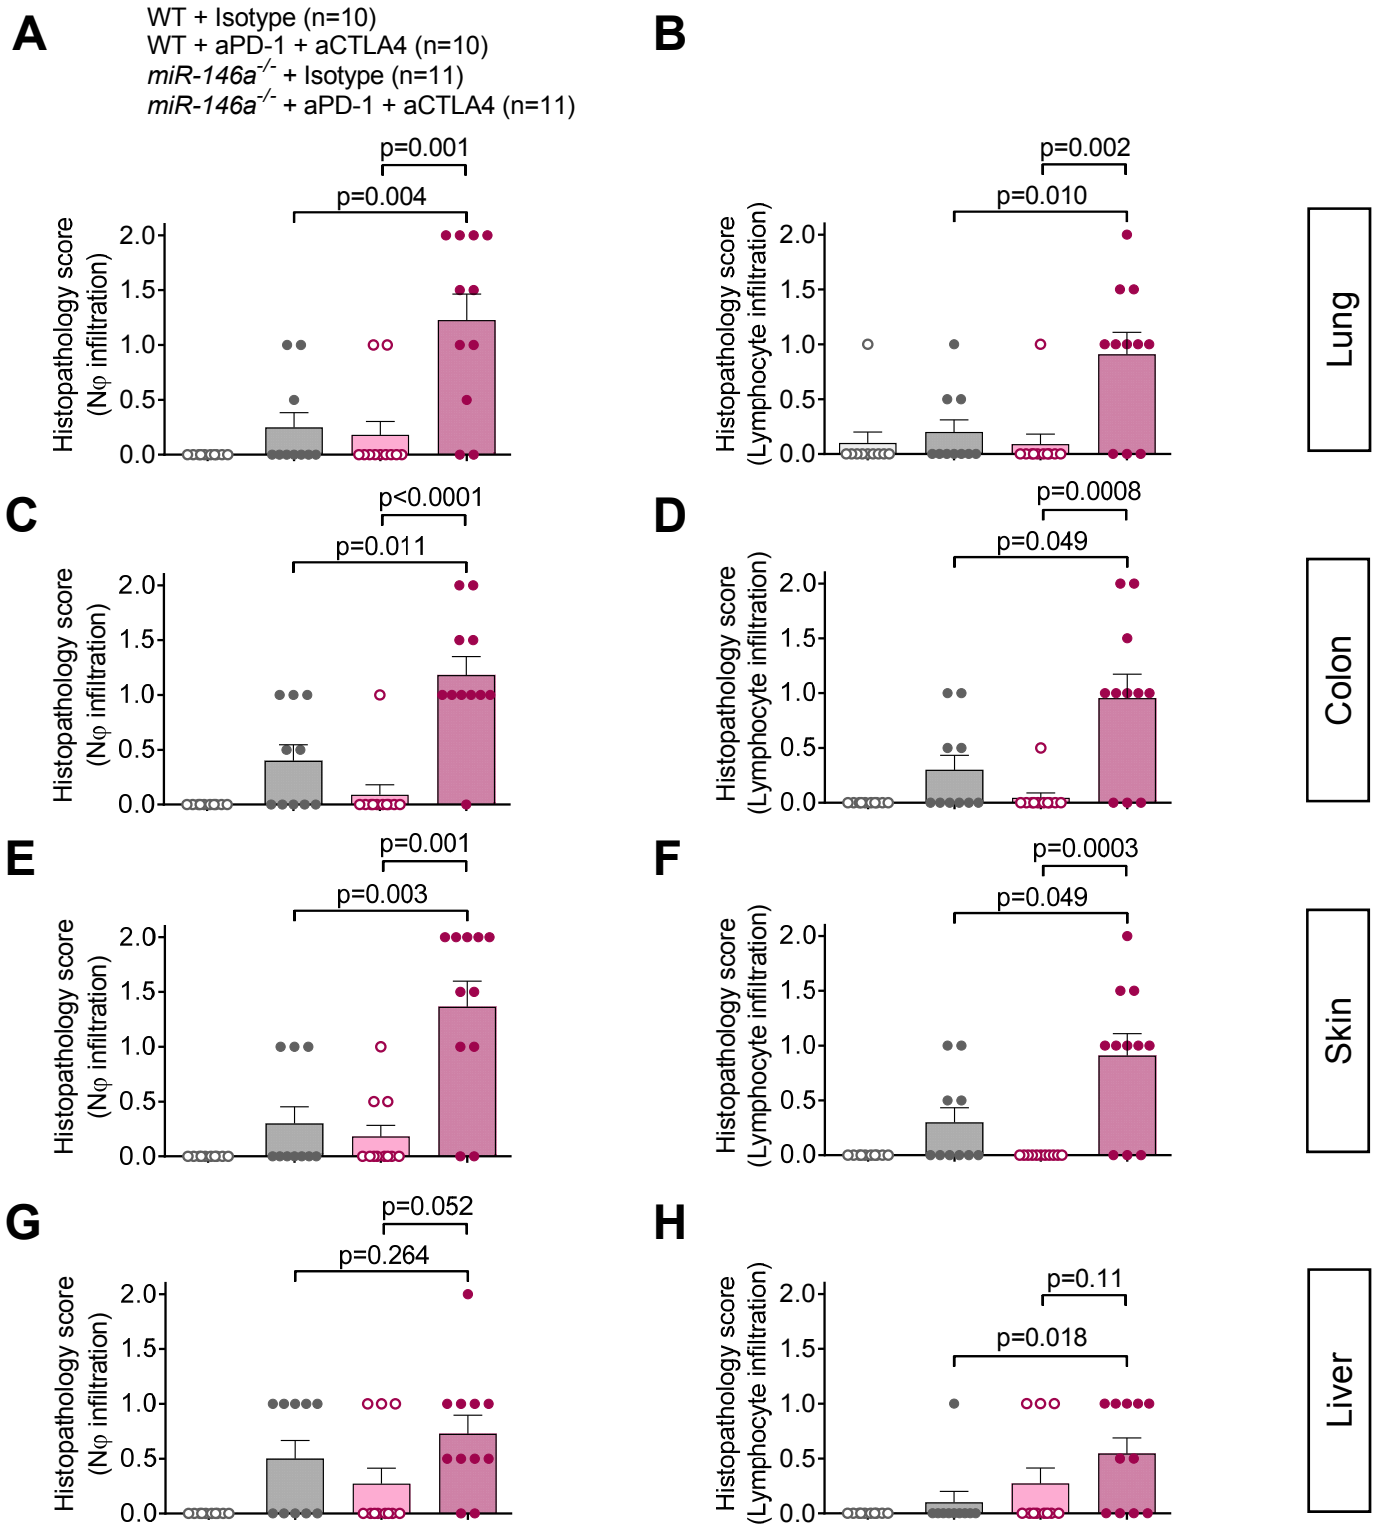

**Suppl. Figure 2: *MiR-146a* deficiency increases irAE severity in mice treated with anti-PD-1 and anti-CTLA-4 combination therapy.** Wildtype (WT) or *miR-146a*<sup>-/-</sup> BM chimeric mice (n=10-11 per group) were treated with anti-PD-1 + anti-CTLA-4 or the respective isotype control antibodies for two weeks as described. The lungs (A,B), colon (C,D), skin (E,F) and liver (G,H) were isolated on day 15 after the first ICI treatment for histopathological assessment. IrAE grading was performed by an experienced pathologist blinded to the treatment groups. 0=absent, 1=mild, 2=massive neutrophil/lymphocyte infiltration. Data were pooled from two independent experiments. Statistical significance was analysed by Kruskal-Wallis test followed by two-stage linear step-up procedure of Benjamini, Krieger and Yekutieli .

## Suppl. Figure 3

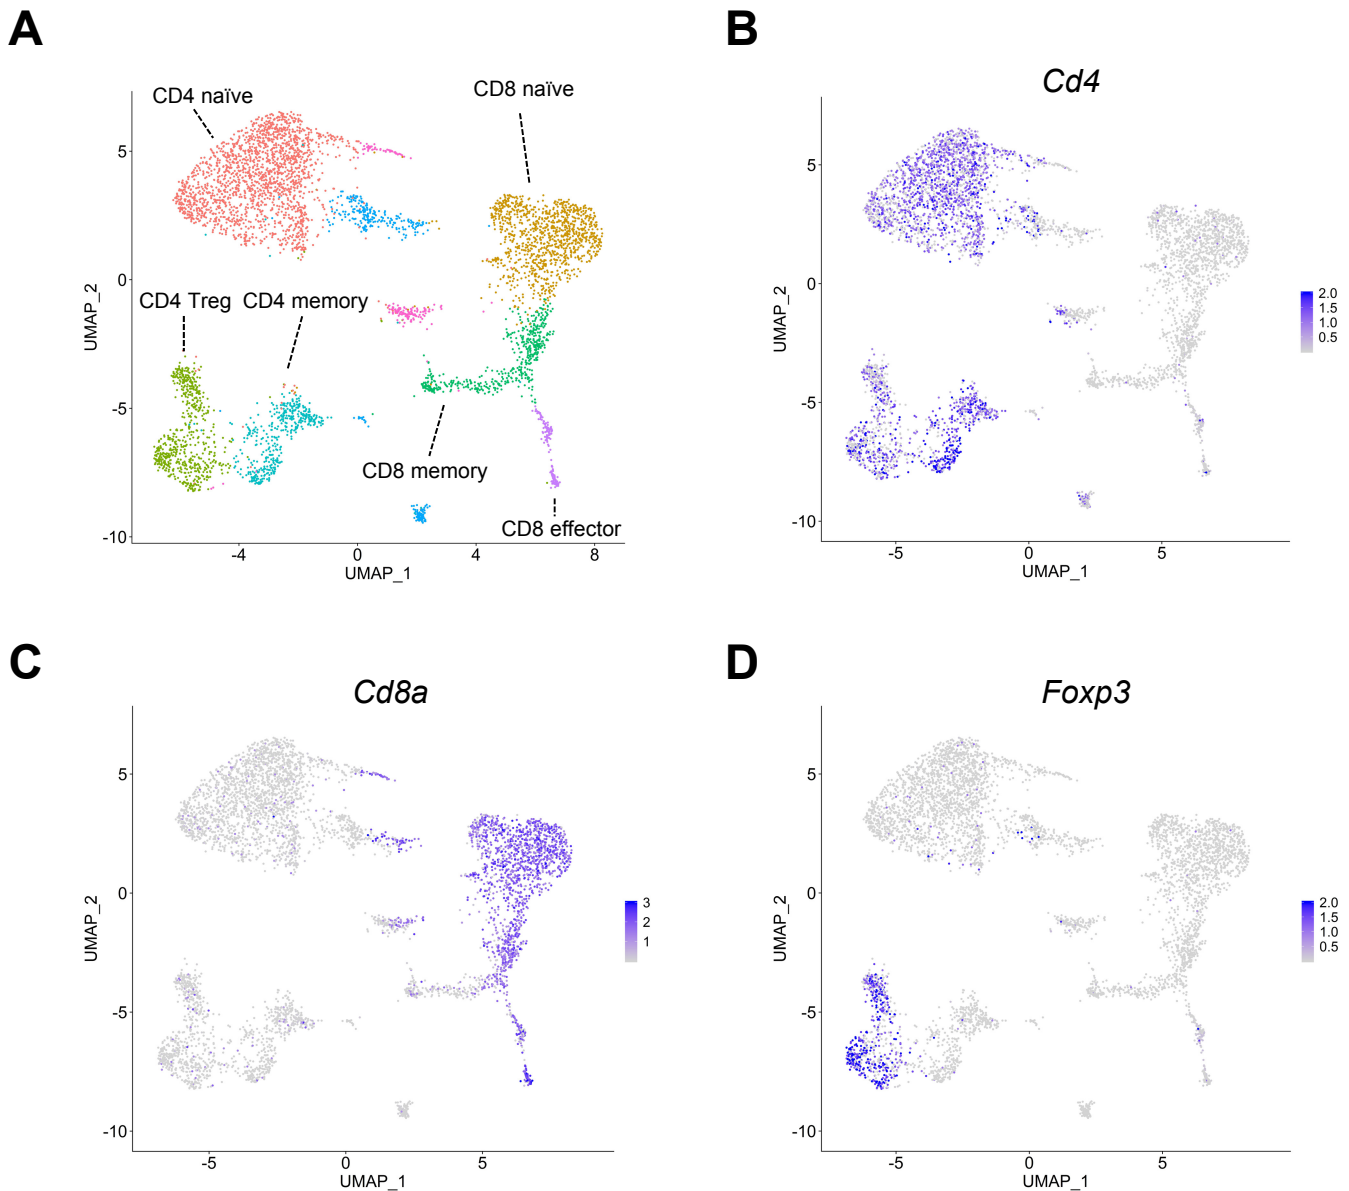

**Suppl. Figure 3: Identification of *miR-146a*<sup>-/-</sup> and WT T cell clusters by scRNA-seq.** WT or *miR-146a*<sup>-/-</sup> mice (n=2 per group) were treated with low dose LPS and anti-PD-1/isotype control antibody for three weeks before capturing of MACS purified splenic T cells for scRNA-seq using 10x v3.1 Next GEM chemistry. Data were processed, visualized and analysed using the Seurat pipeline v3.0. A. Uniform Manifold Approximation and Projection (UMAP) plot of all cells shows distinct T cell clusters. B-D. Examples of feature plots showing expression of characteristic T cell subset markers including *Cd4* (B), *Cd8a* (C) and *Foxp3* (D) are depicted.

## Suppl. Figure 4

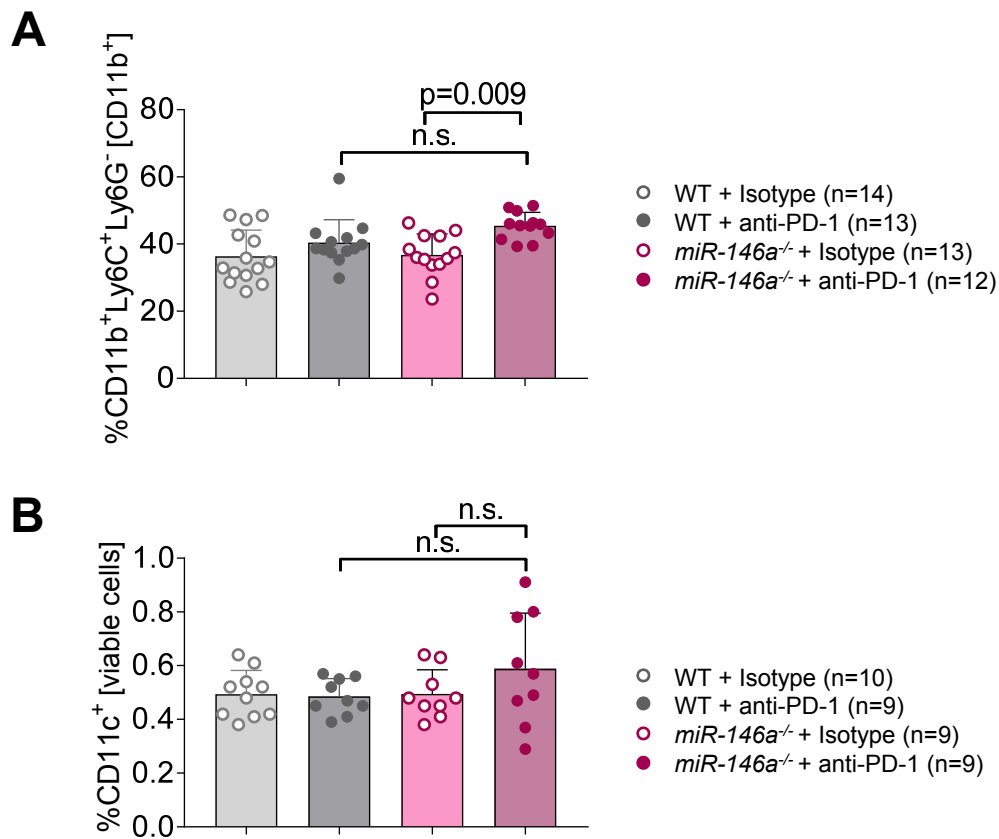

**Suppl. Figure 4: *MiR-146a* deficiency does not affect monocyte and dendritic cell proportions in the spleen.** Wildtype (WT) or *miR-146a*<sup>-/-</sup> mice (n=9-10 per group) were treated with LPS and anti-PD-1/isotype control antibody as indicated and splenocytes assessed by flow cytometry on day 22. Proportions of CD11b<sup>+</sup>Ly6C<sup>+</sup>Ly6G<sup>-</sup> monocytes (A) and CD11c<sup>+</sup> dendritic cells (B) were analyzed. Statistical significance was analysed by one-way ANOVA followed by Tukey's post-hoc test. Pooled data from 2-3 independent *in vivo* experiments are shown.

**Suppl. Table 1: Characteristics of patients included in the rs2910164 SNP analysis**

| Patient characteristics                                                                                                                                                                                                                                                      |                                     | rs2910164 genotype |              |            |
|------------------------------------------------------------------------------------------------------------------------------------------------------------------------------------------------------------------------------------------------------------------------------|-------------------------------------|--------------------|--------------|------------|
|                                                                                                                                                                                                                                                                              |                                     | GG (n=102)         | GC (n=54)    | CC (n=11)  |
| Median age in years (range)                                                                                                                                                                                                                                                  |                                     | 66 (27-85)         | 67.5 (29-85) | 68 (56-82) |
| Male/female                                                                                                                                                                                                                                                                  |                                     | 66% / 34%          | 61% / 39%    | 73% / 27%  |
| Disease                                                                                                                                                                                                                                                                      | malignant melanoma                  | 51 (50.0%)         | 28 (51.9%)   | 7 (63.6%)  |
|                                                                                                                                                                                                                                                                              | adenocarcinoma of the lung          | 22 (21.6%)         | 14 (25.9%)   | 4 (36.4%)  |
|                                                                                                                                                                                                                                                                              | squamous cell carcinoma of the lung | 12 (11.8%)         | 6 (11.1%)    | 0 (0%)     |
|                                                                                                                                                                                                                                                                              | other lung cancer <sup>A</sup>      | 6 (5.9%)           | 2 (3.7%)     | 0 (0%)     |
|                                                                                                                                                                                                                                                                              | other <sup>B</sup>                  | 11 (10.8%)         | 4 (7.4%)     | 0 (0%)     |
| ECOG status                                                                                                                                                                                                                                                                  | 0                                   | 79 (77.5%)         | 38 (70.4%)   | 11 (100%)  |
|                                                                                                                                                                                                                                                                              | 1                                   | 18 (17.6%)         | 14 (25.9%)   | 0 (0%)     |
|                                                                                                                                                                                                                                                                              | 2                                   | 5 (4.9%)           | 2 (3.7%)     | 0 (0%)     |
| Prior line(s) of therapy                                                                                                                                                                                                                                                     | 0                                   | 45 (44.1%)         | 25 (46.3%)   | 7 (63.6%)  |
|                                                                                                                                                                                                                                                                              | 1                                   | 29 (28.4%)         | 15 (27.8%)   | 2 (18.2%)  |
|                                                                                                                                                                                                                                                                              | 2                                   | 18 (17.6%)         | 9 (16.7%)    | 2 (18.2%)  |
|                                                                                                                                                                                                                                                                              | 3+                                  | 10 (9.9%)          | 5 (9.3%)     | 0 (0%)     |
| Prior immune checkpoint inhibitor therapy                                                                                                                                                                                                                                    |                                     | 8 (7.8%)           | 8 (14.8%)    | 1 (9.1%)   |
| Prior interferon therapy                                                                                                                                                                                                                                                     |                                     | 11 (10.8%)         | 9 (16.7%)    | 1 (9.1%)   |
| Prior tyrosine kinase inhibitor therapy                                                                                                                                                                                                                                      |                                     | 9 (8.9%)           | 3 (5.6%)     | 0 (0%)     |
| Radiotherapy                                                                                                                                                                                                                                                                 | before treatment                    | 44 (43.1%)         | 13 (24.1%)   | 4 (36.4%)  |
|                                                                                                                                                                                                                                                                              | during treatment                    | 15 (14.7%)         | 6 (11.1%)    | 4 (36.4%)  |
|                                                                                                                                                                                                                                                                              | whole brain radiotherapy            | 6 (5.9%)           | 6 (11.1%)    | 0 (0%)     |
|                                                                                                                                                                                                                                                                              | stereotactic neurosurgery           | 16 (15.7%)         | 13 (24.1%)   | 0 (0%)     |
| Immune checkpoint inhibitor                                                                                                                                                                                                                                                  | Nivolumab                           | 42 (41.2%)         | 20 (37.0%)   | 4 (36.4%)  |
|                                                                                                                                                                                                                                                                              | median no. of cycles (range)        | 13.0 (1-27)        | 17.5 (1-27)  | 9.5 (7-20) |
|                                                                                                                                                                                                                                                                              | Pembrolizumab                       | 54 (52.9%)         | 31 (57.4%)   | 6 (54.5%)  |
|                                                                                                                                                                                                                                                                              | median no. of cycles (range)        | 15.0 (1-20)        | 12.0 (3-19)  | 7.0 (3-19) |
|                                                                                                                                                                                                                                                                              | PD-L1 inhibitor <sup>C</sup>        | 6 (5.9%)           | 3 (5.6%)     | 1 (9.1%)   |
|                                                                                                                                                                                                                                                                              | median no. of cycles (range)        | 16.5 (4-19)        | 14.0 (4-15)  | 1          |
| Corticosteroids for treatment of side effects                                                                                                                                                                                                                                | none                                | 79 (77.5%)         | 45 (77.8%)   | 4 (36.3%)  |
|                                                                                                                                                                                                                                                                              | low dose (< 1 mg/kg/day)            | 7 (6.9%)           | 4 (7.4%)     | 2 (18.2%)  |
|                                                                                                                                                                                                                                                                              | high dose (≥ 1 mg/kg/day)           | 16 (15.7%)         | 8 (14.8%)    | 5 (45.5%)  |
| Treatment schedule: Atezolizumab 1200mg absolute repeated on d22 or 800mg absolute repeated on d15; Durvalumab 1500mg absolute repeated on d29; Nivolumab 3 mg/kg repeated on d15, Pembrolizumab 2 mg/kg or 200mg absolute repeated on d22.                                  |                                     |                    |              |            |
| <sup>A</sup> poorly differentiated NSCLC (4), SCLC (1), LCLC (1), atypical carcinoid (1), Adenosquamous carcinoma (1)                                                                                                                                                        |                                     |                    |              |            |
| <sup>B</sup> Other: head-neck cancer (4), renal cancer (3), ileocaecal junction adenocarcinoma (1), anaplastic thyroid cancer (1), colorectal cancer (1), DLBCL (1), epitheloid pleural mesothelioma (1), follicular lymphoma (1), TCC of the bladder, parotid carcinoma (1) |                                     |                    |              |            |
| <sup>C</sup> Atezolizumab (7), Avelumab (2), Durvalumab (1)                                                                                                                                                                                                                  |                                     |                    |              |            |
| No., number.                                                                                                                                                                                                                                                                 |                                     |                    |              |            |

**Suppl. Table 2: Allele and genotype frequencies of *MIR146A* rs2910164 in patients treated with an immune checkpoint inhibitor**

| Genotype/allele | absolute number (%)        |                           | OR    | 95% CI       | p-value                    |
|-----------------|----------------------------|---------------------------|-------|--------------|----------------------------|
|                 | CTCAE grade 0-2<br>(n=128) | CTCAE grade 3-4<br>(n=39) |       |              |                            |
| G allele        | 206 (80.5)                 | 52 (66.7)                 | 1.000 |              | ] 0.014                    |
| C allele        | 50 (19.5)                  | 26 (33.3)                 | 2.060 | 1.173-3.618  |                            |
| GG              | 82 (64.1)                  | 20 (51.3)                 | 1.000 |              | ] 0.007 ] 0.683<br>] 0.022 |
| GC              | 42 (32.8)                  | 12 (30.8)                 | 1.171 | 0.523-2.624  |                            |
| CC              | 4 (3.1)                    | 7 (17.9)                  | 7.175 | 1.913-26.917 |                            |
| GC or GG        | 124 (96.9)                 | 32 (82.1)                 | 1.000 |              | ] 0.004                    |
| CC              | 4 (3.1)                    | 7 (17.9)                  | 6.781 | 1.870-24.597 |                            |

**Suppl. Table 3: Frequencies of organ-specific irAEs in the different rs2910164 genotype groups**

| CTCAE grade                                     | rs2910164 genotype |               |             |             |              |             |             |             |              |             |             |             |
|-------------------------------------------------|--------------------|---------------|-------------|-------------|--------------|-------------|-------------|-------------|--------------|-------------|-------------|-------------|
|                                                 | GG (n=102)         |               |             |             | GC (n=54)    |             |             |             | CC (n=11)    |             |             |             |
|                                                 | 1                  | 2             | 3           | 4           | 1            | 2           | 3           | 4           | 1            | 2           | 3           | 4           |
| Gastrointestinal disorders                      | 3<br>(2.9%)        | 3<br>(2.9%)   | 2<br>(2.0%) | 0           | 4<br>(7.4%)  | 2<br>(3.7%) | 1<br>(1.9%) | 0           | 2<br>(18.2%) | 0           | 1<br>(9.1%) | 1<br>(9.1%) |
| Skin and subcutaneous tissue disorders          | 22<br>(21.6%)      | 9<br>(8.8%)   | 4<br>(3.9%) | 0           | 8<br>(14.8%) | 5<br>(9.3%) | 2<br>(3.7%) | 0           | 1<br>(9.1%)  | 1<br>(9.1%) | 1<br>(9.1%) | 0           |
| Hypophysitis                                    | 0                  | 0             | 2<br>(2.0%) | 0           | 0            | 0           | 1<br>(1.9%) | 0           | 0            | 0           | 0           | 0           |
| Thyroid gland disorders                         | 7<br>(6.9%)        | 14<br>(13.7%) | 0           | 0           | 1<br>(1.9%)  | 3<br>(5.6%) | 1<br>(1.9%) | 0           | 0            | 1<br>(9.1%) | 0           | 0           |
| Pancreatitis                                    | 1<br>(1.0%)        | 0             | 1<br>(1.0%) | 2<br>(2.0%) | 0            | 1<br>(1.9%) | 1<br>(1.9%) | 0           | 0            | 0           | 1<br>(9.1%) | 0           |
| Musculoskeletal and connective tissue disorders | 3<br>(2.9%)        | 6<br>(5.9%)   | 2<br>(2.0%) | 0           | 2<br>(3.7%)  | 3<br>(5.6%) | 1<br>(1.9%) | 0           | 2<br>(18.2%) | 1<br>(9.1%) | 1<br>(9.1%) | 0           |
| Eye disorders                                   | 3<br>(2.9%)        | 1<br>(1.0%)   | 0           | 0           | 0            | 1<br>(1.9%) | 0           | 0           | 0            | 0           | 0           | 0           |
| Hepatobiliary disorders                         | 4<br>(3.9%)        | 3<br>(2.9%)   | 3<br>(2.9%) | 1<br>(1.0%) | 2<br>(3.7%)  | 1<br>(1.9%) | 4<br>(7.4%) | 0           | 0            | 0           | 1<br>(9.1%) | 1<br>(9.1%) |
| salivary and lacrimal gland disorders           | 4<br>(3.9%)        | 0             | 0           | 0           | 1<br>(1.9%)  | 2<br>(3.7%) | 0           | 0           | 0            | 0           | 0           | 0           |
| Respiratory disorders                           | 3<br>(2.9%)        | 6<br>(5.9%)   | 1<br>(1.0%) | 0           | 3<br>(5.6%)  | 0           | 1<br>(1.9%) | 0           | 0            | 0           | 0           | 0           |
| Renal disorders                                 | 0                  | 1<br>(1.0%)   | 0           | 0           | 0            | 0           | 1<br>(1.9%) | 0           | 0            | 0           | 0           | 0           |
| Blood and lymphatic system disorders            | 1<br>(1.0%)        | 2<br>(2.0%)   | 3<br>(2.9%) | 1<br>(1.0%) | 1<br>(1.9%)  | 1<br>(1.9%) | 0           | 0           | 1<br>(9.1%)  | 1<br>(9.1%) | 1<br>(9.1%) | 0           |
| Allergic reaction                               | 2<br>(2.0%)        | 3<br>(2.9%)   | 0           | 0           | 0            | 1<br>(1.9%) | 0           | 1<br>(1.9%) | 0            | 0           | 0           | 0           |
| Other                                           | 4<br>(3.9%)        | 0             | 0           | 0           | 0            | 0           | 0           | 0           | 0            | 0           | 0           | 0           |
| Fatigue                                         | 17<br>(16.7%)      | 7<br>(6.9%)   | 0           | 0           | 8<br>(14.8%) | 3<br>(5.6%) | 0           | 0           | 2<br>(18.2%) | 1<br>(9.1%) | 0           | 0           |
| Nervous system disorders                        | 2<br>(2.0%)        | 1<br>(1.0%)   | 1<br>(1.0%) | 0           | 2<br>(3.7%)  | 1<br>(1.9%) | 1<br>(1.9%) | 0           | 0            | 0           | 0           | 0           |

**Suppl. Table 4: Characteristics of patients with malignant melanoma included in the survival analysis**

| Patient characteristics                       |                              | rs2910164 genotype |            |
|-----------------------------------------------|------------------------------|--------------------|------------|
|                                               |                              | GG (n=47)          | CC (n=8)   |
| Median age in years (range)                   |                              | 66 (27-86)         | 68 (63-87) |
| Male/Female                                   |                              | 64% / 36%          | 63% / 37%  |
| ECOG status                                   | 0                            | 40 (85.1%)         | 8 (100%)   |
|                                               | 1                            | 6 (12.8%)          | 0 (0%)     |
|                                               | 2                            | 1 (2.1%)           | 0 (0%)     |
| UICC stage                                    | IIIC                         | 4 (8.5%)           | 2 (25.2%)  |
|                                               | IV                           | 42 (89.4%)         | 6 (75.0%)  |
|                                               | unknown                      | 1 (2.1%)           | 0 (0%)     |
| Metastasis site                               | visceral                     | 28 (59.6%)         | 6 (75.0%)  |
|                                               | liver                        | 12 (25.5%)         | 4 (50.0%)  |
|                                               | bone                         | 13 (27.7%)         | 3 (37.5%)  |
|                                               | cerebral                     | 11 (23.4%)         | 2 (25.0%)  |
|                                               | skin / tissue                | 16 (34.0%)         | 5 (62.5%)  |
| Prior line(s) of therapy                      | 0                            | 36 (76.6%)         | 6 (75.0%)  |
|                                               | 1                            | 6 (12.8%)          | 1 (12.5%)  |
|                                               | 2                            | 3 (6.4%)           | 1 (12.5%)  |
|                                               | 3+                           | 2 (4.2%)           | 0 (0%)     |
| Prior immune checkpoint inhibitor therapy     |                              | 8 (17.0%)          | 2 (25.0%)  |
| Prior interferon therapy                      |                              | 10 (21.3%)         | 2 (25.0%)  |
| Prior tyrosine kinase inhibitor therapy       |                              | 4 (8.5%)           | 0 (0%)     |
| Immune checkpoint inhibitor                   | Nivolumab                    | 3 (6.4%)           | 1 (12.5%)  |
|                                               | median no. of cycles (range) | 52 (8-54)          | 20         |
|                                               | Pembrolizumab                | 44 (93.6%)         | 7 (87.5%)  |
|                                               | median no. of cycles (range) | 16 (1-34)          | 5 (2-25)   |
| Corticosteroids for treatment of side effects | none                         | 39 (83.0%)         | 4 (50.0%)  |
|                                               | low dose (< 1 mg/kg/day)     | 2 (4.3%)           | 2 (25.0%)  |
|                                               | high dose (≥ 1 mg/kg/day)    | 6 (12.8%)          | 2 (25.0%)  |
| Reason for end of treatment                   | disease progression          | 28 (59.6%)         | 7 (87.5%)  |
|                                               | drug toxicity                | 2 (4.3%)           | 0 (0%)     |
|                                               | withdrawal by subject        | 1 (2.1%)           | 0 (0%)     |
|                                               | lost to follow-up            | 2 (4.3%)           | 1 (12.5%)  |
|                                               | end of follow-up time        | 14 (29.8%)         | 0 (0%)     |

No., number.



**Suppl. Table 5: Characteristics of patients with lung cancer included in the survival analysis**

| Patient characteristics                       |                                | rs2910164 genotype |                    |
|-----------------------------------------------|--------------------------------|--------------------|--------------------|
|                                               |                                | GG (n=41)          | CC (n=4)           |
| Median Age                                    |                                | 67 years (30-83)   | 61.5 years (56-82) |
| Male/Female                                   |                                | 68% / 32%          | 75% / 25%          |
| ECOG status                                   | 0                              | 27 (65.9%)         | 4 (100%)           |
|                                               | 1                              | 12 (29.3%)         | 0 (0%)             |
|                                               | 2                              | 2 (4.9%)           | 0 (0%)             |
| Diagnosis                                     | adenocarcinoma                 | 23 (56.1%)         | 4 (100%)           |
|                                               | squamous cell carcinoma        | 12 (29.3%)         | 0 (0%)             |
|                                               | other lung cancer <sup>A</sup> | 6 (24.6%)          | 0 (0%)             |
| UICC stage                                    | IIIC                           | 1 (2.4%)           | 0 (0%)             |
|                                               | IV                             | 38 (92.7%)         | 4 (100.0%)         |
|                                               | unknown                        | 2 (4.9%)           | 0 (0%)             |
| Metastasis site                               | visceral                       | 29 (70.7%)         | 2 (50.0%)          |
|                                               | liver                          | 5 (12.2%)          | 0 (0%)             |
|                                               | bone                           | 15 (36.6%)         | 3 (75.0%)          |
|                                               | cerebral                       | 11 (26.8%)         | 1 (25.0%)          |
|                                               | skin / tissue                  | 4 (9.8%)           | 0 (0%)             |
| Molecular aberration                          | EGFR                           | 3 (7.3%)           | 0 (0%)             |
|                                               | KRAS                           | 1 (2.4%)           | 0 (0%)             |
|                                               | ALK                            | 1 (2.4%)           | 0 (0%)             |
|                                               | no target mutation             | 29 (70.7%)         | 4 (100.0%)         |
|                                               | missing                        | 7 (17.1%)          | 0 (0%)             |
| Prior line(s) of therapy                      | 0                              | 3 (7.3%)           | 1 (25.0%)          |
|                                               | 1                              | 17 (41.5%)         | 2 (50.0%)          |
|                                               | 2                              | 15 (36.6%)         | 1 (25.0%)          |
|                                               | 3+                             | 6 (14.6%)          | 0 (0%)             |
| Prior tyrosine kinase inhibitor therapy       |                                | 4 (9.8%)           | 0 (0%)             |
| Immune checkpoint inhibitor                   | Nivolumab                      | 33 (80.5%)         | 2 (50.0%)          |
|                                               | median no. of cycles (range)   | 12.0 (1-54)        | 7.5 (7-8)          |
|                                               | Pembrolizumab                  | 5 (12.2%)          | 1 (25.0%)          |
|                                               | median no. of cycles (range)   | 7.0 (2-30)         | 3                  |
|                                               | Atezolizumab                   | 3 (7.3%)           | 1 (25.0%)          |
| median no. of cycles (range)                  | 14 (8-17)                      | 1                  |                    |
| Corticosteroids for treatment of side effects | none                           | 27 (65.9%)         | 2 (50.0%)          |
|                                               | low dose (< 1 mg/kg/day)       | 2 (4.9%)           | 0 (0%)             |
|                                               | high dose (≥ 1 mg/kg/day)      | 12 (29.2%)         | 2 (50.0%)          |
| Reason for end of treatment                   | disease progression            | 28 (68.3%)         | 4 (100.0%)         |
|                                               | drug toxicity                  | 3 (7.3%)           | 0 (0%)             |
|                                               | lost to follow-up              | 3 (7.3%)           | 0 (0%)             |
|                                               | end of follow-up time          | 7 (17.1%)          | 0 (0%)             |

<sup>A</sup> poorly differentiated NSCLC (3), SCLC (1), atypical carcinoid (1), Adenosquamous carcinoma (1)  
No., number.

**Suppl. Table 6: Monoclonal antibodies used for flow cytometry**

| <b>Antibody</b>   | <b>Clone</b> | <b>Supplier</b> |
|-------------------|--------------|-----------------|
| anti-CD4          | GK1.5        | BioLegend       |
| anti-CD8a         | 53-6.7       | BioLegend       |
| anti-CD11b        | M1/70        | BioLegend       |
| anti-CD11c        | N418         | BioLegend       |
| anti-CD44         | IM7          | BioLegend       |
| anti-CD45         | 104          | ThermoFisher    |
| anti-CD62L        | MEL-14       | BioLegend       |
| anti-CD69         | H1.2F3       | ThermoFisher    |
| anti-IFN $\gamma$ | XMG1.2       | BioLegend       |
| anti-Ly6C         | HK1.4        | BioLegend       |
| anti-Ly6G         | 1A8          | BioLegend       |
| anti-perforin     | eBioOMAK-D   | ThermoFisher    |
